# Supplementary material for: Association of worker characteristics and early reimbursement for physical therapy, chiropractic and opioid prescriptions with workers’ compensation claim duration, for cases of acute low back pain: an observational cohort study
Source: HighWire-hosted journal article supplement (doi:10.1136/bmjopen-2015-007836), 2015-08-01

**Table S1: Search strategy for the Cochrane Back Group trials registry\***

Search Strategy in Cochrane Library:

\*:ti,ab,kw in Trials, with Back Group in Review Groups      6476

Endnote search strategy:

Any field contains: acute AND Any field contains chiropractic (43)

Any field contains: acute AND Any field contains physiotherapy\* (87)

Any field contains: acute AND Any field contains opioid (30)

Any field contains: opioid NOT Any field contains: surgery NOT Any field contains:  
chronic (28)

Any field contains: emergency (57) NOT Any field contains: whiplash (18)

\*On May 1, 2015 we used the Cochrane Library to search the Cochrane Back Review Group (CBRG) Trials Register, which we exported to Endnote. We also screened the included studies lists of recent CBRG Reviews of chiropractic and physiotherapy interventions for acute low back pain (Franke et al., 2015, Rubinstein et al., 2012).

**Table S2: Randomized controlled trials of acute low back pain assessing the effect of opioids, chiropractic care, or physical therapy, and their generalizability to injured workers receiving disability benefits**

| Study                 | Participants and Interventions                                                                                                                                                                | Representation of injured workers receiving lost-time disability benefits for acute low back pain                                                                                                                                                                                                                                                           |
|-----------------------|-----------------------------------------------------------------------------------------------------------------------------------------------------------------------------------------------|-------------------------------------------------------------------------------------------------------------------------------------------------------------------------------------------------------------------------------------------------------------------------------------------------------------------------------------------------------------|
| Glover 1974           | 84 patients with unilateral low back pain (LBP), randomized to manipulation or control (sham diathermy)                                                                                       | No mention regarding receipt of lost-time disability benefits                                                                                                                                                                                                                                                                                               |
| Bergquist-Ullman 1977 | 217 patients consulting a workplace health centre with acute or subacute LBP randomized to back school, physiotherapy or placebo                                                              | At least 88% of patients were enrolled with acute LBP, and of the 217, 184 were "sick-listed" for a median of 21 days during the study, but there was no mention regarding receipt of lost-time disability benefits                                                                                                                                         |
| Rasmussen 1979        | 26 patients with LBP duration <3weeks, randomized to manipulation or diathermy                                                                                                                | No mention regarding receipt of lost-time disability benefits                                                                                                                                                                                                                                                                                               |
| Hoehler 1981          | 95 patients with palpatory cues indicating hyperalgesia or a restricted or painful range of vertebral motion, randomized to rotational manipulation of the trunk or massage                   | No mention regarding receipt of lost-time disability benefits                                                                                                                                                                                                                                                                                               |
| Farrell 1982          | 48 subjects with acute LBP duration <3 weeks, randomized to passive mobilization and manipulation or combination of diathermy, exercises and ergonomic advice                                 | No mention regarding receipt of lost-time disability benefits                                                                                                                                                                                                                                                                                               |
| Gilbert 1985          | 270 patients presenting with LBP, randomized to bed rest or physiotherapy                                                                                                                     | The authors reported that "people who were receiving workman's compensation were also slower to recover." p.794, but they did not report any associated data (e.g. how many patients were receiving disability benefits, or the quantitative results for this subgroup).                                                                                    |
| Waterworth 1985       | 112 patients with acute mechanical LBP, randomized to ergonomic advice/ Diflunisal or ergonomic advice/ conservative physiotherapy (ultrasound and exercise) or ergonomic advice/manipulation | The authors enrolled a mixed group of patients, that may include up to 54% receiving lost-time claim benefits, but that the proportion is unequal between study group (ranging from 47% to 63%) and the results are provided for the total population which precludes confident generalizability to only those who were receiving lost-time claim benefits. |
| Hadler 1987           | 54 subjects with acute LBP, randomized to mobilization or manipulation                                                                                                                        | Patients who were receiving disability benefits were explicitly excluded from this trial: "neither workers' compensation nor disability insurance should be at issue [sic] and the acute low-back pain must not be considered work-related."pg 703                                                                                                          |
| MacDonald 1990        | 95 subjects with LBP duration <4 weeks, randomized to osteopathic manipulation or control (advice to rest and resume activities gradually)                                                    | "Less than 30% [of the study group] suffered loss of income because of disability" pg. 366                                                                                                                                                                                                                                                                  |

|                |                                                                                                                                                                                                                                                                                                                        |                                                                                                                                                                                                                                                                                                       |
|----------------|------------------------------------------------------------------------------------------------------------------------------------------------------------------------------------------------------------------------------------------------------------------------------------------------------------------------|-------------------------------------------------------------------------------------------------------------------------------------------------------------------------------------------------------------------------------------------------------------------------------------------------------|
| Cramer 1993    | 36 subjects with mechanical LBP less than two weeks duration randomized to side-lying manipulation, electrical stimulation and cold packs or control (detuned ultrasound, cold packs and 15-30 sec. gentle massage)                                                                                                    | Patients who were receiving disability benefits were explicitly excluded from this trial. Inclusion criteria stipulate "no litigation or workers' compensation" (as per the review by Rubinstein 2012, pg. 52)                                                                                        |
| Skargren 1997  | 323 patients with back and neck pain of mixed duration, randomized to chiropractic or physiotherapy.                                                                                                                                                                                                                   | 51% of patients (166 of 323) were on "sick-leave" when enrolled (Table 3, pg. 2170), but there was no mention regarding receipt of lost-time disability benefits.                                                                                                                                     |
| Innes 1998     | 123 patients with acute LBP, randomized to ketorolac or acetaminophen/codeine                                                                                                                                                                                                                                          | Patients who were receiving disability benefits were limited during enrollment: "Because Workers Compensation status might influence response to therapy, we limited each site to 10 work-related back injuries, hoping to limit such cases to no more than half the total study enrollment." pg. 550 |
| Cherkin 1998   | 321 adults with acute LBP randomized to the McKenzie method of physical therapy, chiropractic manipulation, or provision of an educational booklet                                                                                                                                                                     | patients who were receiving disability benefits were explicitly excluded from this trial: "Subjects who... were involved in claims for compensation or litigation because of the back injury... were also excluded"; pg. 1022                                                                         |
| Seferlis 1998  | 180 patients sick-listed for < 2 weeks for LBP randomized to General Practitioner Program (rest, sick-leave, analgesics etc.) or Manual Therapy Program (autotractor, manipulation, mobilization etc.) or Intensive Training Program (information, muscle training and general condition training 3x/week for 8 weeks) | All enrolled patients were "sick listed for acute low-back pain for up to 2 weeks", but there is no mention regarding receipt of lost-time disability benefits.                                                                                                                                       |
| Morton 1999    | 29 patients with acute mechanical LBP, randomized to manipulation/ exercise or exercise alone                                                                                                                                                                                                                          | Patients who were receiving disability benefits were explicitly excluded from this trial: "Exclusion criteria were ... third-party, public liability or workers' compensation claimants"; pg. 185                                                                                                     |
| Veenema 2000   | 155 patients with musculoskeletal LBP, randomized to meperidine or ketorolac                                                                                                                                                                                                                                           | No mention regarding receipt of lost-time disability benefits                                                                                                                                                                                                                                         |
| Metscher 2001  | 192 Patients with acute LBP randomized to dextropropofol-trometamol or tramadolhydrochloride                                                                                                                                                                                                                           | Abstract in English, paper in German. No mention in the abstract about receipt of lost-time disability benefits                                                                                                                                                                                       |
| Palangio 2002  | 147 patients with acute LBP, first episode or exacerbation of chronic condition with onset <48 hours before enrolment, randomized to combination hydrocodone 7.5 mg and ibuprofen 200 mg (HC/IB) or combination oxycodone 5 mg and acetaminophen 325 mg (OX/AC)                                                        | No mention regarding receipt of lost-time disability benefits                                                                                                                                                                                                                                         |
| Hofstee 2002   | 250 patients with sciatica of less than 1 months duration randomized to bed rest, physiotherapy or continuation of activities of daily living                                                                                                                                                                          | No mention regarding receipt of lost-time disability benefits                                                                                                                                                                                                                                         |
| Johnstone 2002 | 12 patients with acute LBP with signs of psychological distress (DRAM score Modified Zung score >17) randomized to cognitive behavioral therapy and conventional physiotherapy or conventional physiotherapy alone                                                                                                     | Patients with "ongoing medico legal issues" were excluded (pg.183). No mention regarding receipt of lost-time disability benefits                                                                                                                                                                     |

|                    |                                                                                                                                                                                                                                                                                                      |                                                                                                                                            |
|--------------------|------------------------------------------------------------------------------------------------------------------------------------------------------------------------------------------------------------------------------------------------------------------------------------------------------|--------------------------------------------------------------------------------------------------------------------------------------------|
| Childs<br>2004     | 131 patients with LBP of median duration of 27 days, randomized to manipulation and exercise or exercise alone                                                                                                                                                                                       | 39.8% of patients had missed work due to LBP, Table 2 pg. 925, but there was no mention regarding receipt of lost-time disability benefits |
| Hoiriis<br>2004    | 192 patients with LBP of 3 to 6 weeks duration randomized to chiropractic adjustments with placebo medicine, muscle relaxants with sham adjustments, or placebo medicine with sham adjustments                                                                                                       | No mention regarding receipt of lost-time disability benefits                                                                              |
| Salvador<br>2005   | 28 subjects randomly allocated to a muscle energy technique or transcutaneous electrical nerve stimulation (TENS)                                                                                                                                                                                    | Abstract in English, paper in Portuguese. No mention in the abstract about receipt of lost-time disability benefits                        |
| Brennan<br>2006    | 123 patients referred to physiotherapy for LBP less than 90 days duration, randomized to manipulation or specific exercise or stabilization                                                                                                                                                          | No mention regarding receipt of lost-time disability benefits                                                                              |
| Santilli<br>2006   | 102 patients with acute moderate to severe radiating LBP of duration <10 days with MRI evidence of disc protrusion, randomized to manipulation or simulated manipulation                                                                                                                             | No mention regarding receipt of lost-time disability benefits                                                                              |
| Hancock<br>2007    | 240 subjects with acute LBP duration < 6 weeks, randomized to four groups: control (placebo drug and placebo manipulation) or NSAIDs (diclofenac and placebo manipulation) or manipulation (placebo drug and active manipulation) or manipulation and NSAIDs (diclofenac and active manipulation)    | No mention regarding receipt of lost-time disability benefits                                                                              |
| Lee 2008           | Study of 78 musculoskeletal pain patients, 67% with LBP, randomized to tramadol/paracetamol (n=28 with LBP) or ketorolac/paracetamol (n=24 with LBP)                                                                                                                                                 | No mention regarding receipt of lost-time disability benefits                                                                              |
| Lau 2008           | 110 patients with acute LBP, randomized to immediate intervention (advice to stay active, Back Care booklet, reassurance, advice, interferential current therapy) or control (walking training and prescription of walking aids as indicated) followed by outpatient physiotherapy (for both groups) | 12% of patients (13 of 110) had work-related injuries (see Table 1), but no mention regarding receipt of lost-time disability benefits     |
| Selkow<br>2009     | 20 subjects with acute LBP, randomly allocated to muscle energy technique or sham manual treatment                                                                                                                                                                                                   | No mention regarding receipt of lost-time disability benefits                                                                              |
| Cleland<br>2009    | 112 subjects with LBP, that met 4 out of 5 criteria for a clinical prediction rule for LBP likely to respond to manipulation, randomized to supine thrust manipulation, side-lying thrust manipulation or non-thrust manipulation                                                                    | Only 6% of patients were unable to work due to LBP. Table 2, pg.2724.                                                                      |
| Hallegraef<br>2009 | 64 patients with acute nonspecific LBP duration <16 days, randomized to manipulative therapy plus physical therapy or physical therapy alone                                                                                                                                                         | No mention regarding receipt of lost-time disability benefits                                                                              |

|               |                                                                                                                                                                                               |                                                                                                                                  |
|---------------|-----------------------------------------------------------------------------------------------------------------------------------------------------------------------------------------------|----------------------------------------------------------------------------------------------------------------------------------|
| Sutlive 2009  | 60 subjects with LBP meeting 3 out of 5 criteria for a clinical prediction rule for LBP likely to respond to manipulation, randomized to lumbopelvic manipulation or neutral gap manipulation | Patients "with litigation pending for their LBP" were excluded.<br>No mention regarding receipt of lost-time disability benefits |
| Juni 2009     | 104 patients with acute LBP duration < 4 weeks, randomized to standard care with manipulation or standard care alone                                                                          | No mention regarding receipt of lost-time disability benefits                                                                    |
| Machado 2010  | 148 adults with acute LBP duration <6 weeks, randomized to the McKenzie method and first-line care (advice, reassurance and time-contingent acetaminophen) or first-line care alone           | Only 3% of participants (4 of 146) were receiving disability benefits for their injury (see Table 1)                             |
| Lewis 2011    | 89 patients with acute LBP duration < 3 months, randomized to strain-counterstrain manual therapy/exercise or exercise alone                                                                  | No mention regarding receipt of lost-time disability benefits                                                                    |
| Biondi 2013   | 1664 patients with acute LBP, randomized to tapentadol or oxycodone                                                                                                                           | No mention regarding receipt of lost-time disability benefits                                                                    |
| Goertz 2013   | 91 patients with acute LBP, duration < 4 weeks, randomized to standard medical care and chiropractic manipulation or standard care alone                                                      | No mention regarding receipt of lost-time disability benefits                                                                    |
| Behrbalk 2014 | 65 adults with acute LBP, randomized to morphine or morphine/promethazine                                                                                                                     | No mention regarding receipt of lost-time disability benefits                                                                    |
| Eken 2014     | 137 patients with moderate or severe acute LBP, randomized to paracetamol, morphine or dextketoprofen                                                                                         | No mention regarding receipt of lost-time disability benefits                                                                    |
| Tanen 2014    | 44 patients with acute radicular LBP, randomized to lidocaine or ketorolac                                                                                                                    | No mention regarding receipt of lost-time disability benefits                                                                    |

## References for Tables S1 and S2

1. Franke H, Fryer G, Ostelo RW, Kamper SJ. Muscle energy technique for non-specific low-back pain. *Cochrane Database Syst Rev* 2015; 2: CD009852.
2. Rubinstein SM, Terwee CB, Assendelft WJ, de Boer MR, van Tulder MW. Spinal manipulative therapy for acute low-back pain. *Cochrane Database Syst Rev* 2012; 9: CD008880.
3. Glover JR, Morris JG, Khosla T. Back pain: a randomized clinical trial of rotational manipulation of the trunk. *British journal of industrial medicine* 1974; 31: 59-64.
4. Bergquist-Ullman M, Larsson U. Acute low back pain in industry. A controlled prospective study with special reference to therapy and confounding factors. *Acta orthopaedica Scandinavica* 1977; 48(Suppl. 170): 1-117.
5. Rasmussen GG. Manipulation in treatment of low back pain (a randomized clinical trial. *Man-Med* 1979; 17: 8-10.
6. Hoehler FK, Tobis JS, Buerger AA. Spinal manipulation for low back pain. *JAMA* 1981; 245: 1835-1838.
7. Farrell JP, Twomey LT. Acute low back pain. Comparison of two conservative treatment approaches. *Medical journal of Australia* 1982; 1: 160-164.
8. Gilbert JR, Taylor DW, Hildebrand A, Evans C. Clinical practice of common treatments for low back pain in family practice. *British Medical Journal Clinical Research Ed* 1985; 291: 791-794.
9. Waterworth RF, Hunter IA. An open study of diflunisal, conservative and manipulative therapy in the management of acute mechanical low back pain. *New Zealand medical journal* 1985; 98: 372-375.
10. Hadler NM, Curtis P, Gillings DB, Stinnett S. A benefit of spinal manipulation as adjunctive therapy for acute low-back pain: a stratified controlled trial. *Spine* 1987; 12: 702-706.
11. MacDonald RS, Bell CMJ. An open controlled assessment of osteopathic manipulation in nonspecific low-back pain. *Spine* 1990; 15: 364-370.
12. Cramer GD, Humphreys CR, Hondras MA, McGregor M, Triano JJ. The Hmax/Mmax ratio as an outcome measure for acute low back pain. *Journal of manipulative and physiological therapeutics* 1993; 16: 7-13.
13. Skargren EI, Oberg BE, Carlsson PG, Gade M. Cost and effectiveness analysis of chiropractic and physiotherapy treatment for low back and neck pain. Six-month follow-up. *Spine* 1997; 22: 2167-2177.
14. Innes GD, Croskerry P, Worthington J, Beveridge R, Jones D. Ketorolac versus acetaminophen-codeine in the emergency department treatment of acute low back pain. *Journal of emergency medicine* 1998; 16: 549-556.
15. Cherkin DC, Deyo RA, Battie M, Street J, Barlow W. A comparison of physical therapy, chiropractic manipulation, and provision of an educational booklet for the treatment of patients with low back pain. *N Engl J Med* 1998; 339: 1021-1029.
16. Seferlis T, Németh G, Carlsson AM, Gillström P. Conservative treatment in patients sick-listed for acute low-back pain: a prospective randomised study with 12 months' follow-up. *European spine journal* 1998; 7: 461-470.
17. Morton JE. Manipulation in the treatment of acute low back pain. *Journal of manual & manipulative therapy* 1999; 7: 182-189.
18. Veenema KR, Leahey N, Schneider S. Ketorolac versus meperidine: ED treatment of severe musculoskeletal low back pain. *American journal of emergency medicine* 2000; 18: 404-407.

19. Metscher B, Kübler U, Jahnle-Kracht H. Dexketoprofen-tramadol and tramadol in acute lumbago [German]. *Fortschritte der Medizin Originalien* 2001; 118: 147-151.
20. Palangio M, Morris E, Doyle RT, Dornseif BE, Valente TJ. Combination hydrocodone and ibuprofen versus combination oxycodone and acetaminophen in the treatment of moderate or severe acute low back pain. *Clinical therapeutics* 2002; 24: 87-99.
21. Hofstee DJ, Gijtenbeek JM, Hoogland PH, Houwelingen HC, Kloet A, Lötters F, et al. Westeinde sciatica trial: randomized controlled study of bed rest and physiotherapy for acute sciatica. *Journal of neurosurgery* 2002; 96(1 Suppl): 45-49.
22. Johnstone R, Donaghy M, Martin D. A pilot study of a cognitive-behavioural therapy approach to physiotherapy, for acute low back pain patients, who show signs of developing chronic pain. *Advances in physiotherapy* 2002; 4: 182-188.
23. Childs JD, Fritz JM, Flynn TW, Irrgang JJ, Johnson KK, Majkowski GR, et al. A clinical prediction rule to identify patients with low back pain most likely to benefit from spinal manipulation: a validation study. *Annals of internal medicine* 2004; 141: 920-928.
24. Hoiriis KT, Pflieger B, McDuffie FC, Cotsonis G, Elsangak O, Hinson R, et al. A Randomized Clinical Trial Compring Chiropractic Adjustments to Muscle Relaxants for Subacute Low Back Pain. *Journal of manipulative and physiological therapeutics* 2004; 27: 388-398.
25. Salvador D, Neto PD, Ferrari FP. Application of muscle energy technique in garbage collectors with acute mechanical lumbar pain [Portuguese]. *Fisioterapia e Pesquisa* 2005; 12: 20-27.
26. Brennan GP, Fritz JM, Hunter SJ, Thackeray A, Delitto A, Erhard RE. Identifying subgroups of patients with acute/subacute "nonspecific" low back pain: results of a randomized clinical trial. *Spine* 2006; 31: 623-631.
27. Santilli V, Beghi E, Finucci S. Chiropractic manipulation in the treatment of acute back pain and sciatica with disc protrusion: a randomized double-blind clinical trial of active and simulated spinal manipulations. *Spine journal* 2006; 6: 131-137.
28. Hancock MJ, Maher CG, Latimer J, McLachlan AJ, Cooper CW, Day RO, et al. Assessment of diclofenac or spinal manipulative therapy, or both, in addition to recommended first-line treatment for acute low back pain: a randomised controlled trial. *Lancet* 2007; 370: 1638-1643.
29. Lee HKH, Ting SM, Lau FL. A randomised control trial comparing the efficacy of tramadol and paracetamol against ketorolac and paracetamol in the management of musculoskeletal pain in the emergency department. *Hong Kong Journal of Emergency Medicine* [Internet]. 2008; 15(1):[5-11 pp.]
30. Lau PM, Chow DH, Pope MH. Early physiotherapy intervention in an Accident and Emergency Department reduces pain and improves satisfaction for patients with acute low back pain: a randomised trial. *Australian journal of physiotherapy* 2008; 54: 243-249.
31. Selkow N, Grindstaff T, Cross K, Pugh K, Hertel J, Saliba S. Short-Term Effect of Muscle Energy Technique on Pain in Individuals with Non-Specific Lumbopelvic Pain: A Pilot Study. *Journal of Manual & Manipulative Therapy* 2009; 17: 14-18.
32. Cleland JA, Fritz JM, Kulig K, Davenport TE, Eberhart S, Magel J, et al. Comparison of the effectiveness of three manual physical therapy techniques in a subgroup of patients with low back pain who satisfy a clinical prediction rule: a randomized clinical trial. *Spine (Phila Pa 1976)* 2009; 34: 2720-2729.
33. Hallegraeff JM, Hallegraeff HJ, Greef M, Winters JC, Lucas C. Manipulative therapy and clinical prediction criteria in treatment of acute nonspecific low back pain. *Perceptual and motor skills* 2009; 108: 196-208.

34. Sutlive TG, Mabry LM, Easterling EJ, Durbin JD, Hanson SL, Wainner RS, et al. Comparison of short-term response to two spinal manipulation techniques for patients with low back pain in a military beneficiary population. *Military medicine* 2009; 174: 750-756.
35. Jüni P, Battaglia M, Nüesch E, Hämmerle G, Eser P, Beers R, et al. A randomised controlled trial of spinal manipulative therapy in acute low back pain. *Annals of the rheumatic diseases* 2009; 68: 1420-1427.
36. Machado LA, Maher CG, Herbert RD, Clare H, McAuley JH. The effectiveness of the McKenzie method in addition to first-line care for acute low back pain: a randomized controlled trial. *BMC Med* 2010; 8: 10.
37. Lewis C, Souvlis T, Sterling M. Strain-Counterstrain therapy combined with exercise is not more effective than exercise alone on pain and disability in people with acute low back pain: a randomised trial. *Journal of physiotherapy* 2011; 57: 91-98.
38. Biondi D, Xiang J, Benson C, Etropolski M, Moskovitz B, Rauschkolb C. Tapentadol immediate release versus oxycodone immediate release for treatment of acute low back pain. *Pain physician* 2013; 16: E237-E246.
39. Goertz CM, Long CR, Hondras MA, Petri R, Delgado R, Lawrence DJ, et al. Adding chiropractic manipulative therapy to standard medical care for patients with acute low back pain: results of a pragmatic randomized comparative effectiveness study. *Spine* 2013; 38: 627-634.
40. Behrbalk E, Halpern P, Boszczyk BM, Parks RM, Chechik O, Rosen N, et al. Anxiolytic medication as an adjunct to morphine analgesia for acute low back pain management in the emergency department: A prospective randomized trial. *Spine* 2014; 39: 17-22.
41. Eken C, Serinken M, Elicabuk H, Uyanik E, Erdal M. Intravenous paracetamol versus dextetoprofen versus morphine in acute mechanical low back pain in the emergency department: A randomised double-blind controlled trial. *Emergency medicine journal* 2014; 31: 177-181.
42. Tanen DA, Shimada M, Danish DC, Santos FD, Makela M, Riffenburgh RH. Intravenous lidocaine for the Emergency Department treatment of acute radicular low back pain, a randomized controlled trial. *Journal of emergency medicine* 2014; 47: 119-124.

**Table S3: Sensitivity analysis of factors associated with time to claim closure, entering chiropractic care and physiotherapy as time-dependant co-variates (n=1,442)**

|                                           | Univariate            |         | Multivariable                  |         |
|-------------------------------------------|-----------------------|---------|--------------------------------|---------|
|                                           | Hazard Ratio (99% CI) | p-value | Adjusted Hazard Ratio (99% CI) | p-value |
| <b>Baseline predictors</b>                |                       |         |                                |         |
| Age categories in years                   |                       | <0.001  |                                | <0.001  |
| 15 to <25                                 | 1.00                  |         | 1.00                           |         |
| 25 to <35                                 | 0.88 (0.65, 1.19)     |         | 0.79 (0.58, 1.08)              |         |
| 35 to <45                                 | 0.78 (0.59, 1.04)     |         | 0.70 (0.52, 0.95)              |         |
| 45 to <55                                 | 0.76 (0.56, 1.02)     |         | 0.67 (0.49, 0.91)              |         |
| 55 to 65                                  | 0.56 (0.40, 0.80)     |         | 0.52 (0.36, 0.74)              |         |
| Gender                                    |                       | 0.114   |                                | 0.451   |
| Females                                   | 1.09 (0.95, 1.26)     |         | 0.96 (0.82, 1.12)              |         |
| Males                                     | 1.00                  |         | 1.00                           |         |
| First language                            |                       | 0.137   |                                | 0.327   |
| English                                   | 1.00                  |         | 1.00                           |         |
| Other                                     | 0.83 (0.59, 1.15)     |         | 0.88 (0.63, 1.23)              |         |
| Pre-disability income in dollars per week |                       |         |                                |         |
| <b>At 30 days:</b>                        |                       |         |                                |         |
| ≤480                                      | 1.00                  | -       | 1.00                           | -       |
| 481-694                                   | 1.15 (0.91, 1.45)     | 0.125   | 1.08 (0.85, 1.37)              | 0.396   |
| 695-920                                   | 1.21 (0.96, 1.54)     | 0.034   | 1.05 (0.81, 1.36)              | 0.614   |
| >920                                      | 1.20 (0.94, 1.52)     | 0.050   | 1.04 (0.80, 1.35)              | 0.689   |
| <b>At 60 days:</b>                        |                       |         |                                |         |
| ≤480                                      | 1.00                  | -       | 1.00                           | -       |
| 481-694                                   | 1.09 (0.89, 1.34)     | 0.273   | 1.03 (0.83, 1.27)              | 0.710   |
| 695-920                                   | 1.13 (0.92, 1.39)     | 0.137   | 0.97, (0.77, 1.22)             | 0.746   |
| >920                                      | 1.08 (0.88, 1.33)     | 0.326   | 0.94 (0.74, 1.19)              | 0.477   |
| <b>At 180 days:</b>                       |                       |         |                                |         |
| ≤480                                      | 1.00                  | -       | 1.00                           | -       |
| 481-694                                   | 0.89 (0.68, 1.17)     | 0.267   | 0.85 (0.65, 1.12)              | 0.130   |
| 695-920                                   | 0.84 (0.63, 1.12)     | 0.115   | 0.71 (0.52, 0.96)              | 0.003   |
| >920                                      | 0.72 (0.54, 0.97)     | 0.004   | 0.61 (0.45, 0.84)              | <0.001  |
| <b>At 365 days:</b>                       |                       |         |                                |         |
| ≤480                                      | 1.00                  | -       | 1.00                           | -       |
| 481-694                                   | 0.65 (0.36, 1.18)     | 0.064   | 0.63 (0.35, 1.16)              | 0.051   |
| 695-920                                   | 0.53 (0.28, 1.02)     | 0.012   | 0.44 (0.23, 0.84)              | 0.001   |
| >920                                      | 0.39 (0.20, 0.75)     | <0.001  | 0.32 (0.16, 0.63)              | <0.001  |
| Opioid prescription                       |                       | <0.001  |                                | <0.001  |
| Yes                                       | 0.62 (0.48, 0.80)     |         | 0.69 (0.53, 0.89)              |         |
| No                                        | 1.00                  |         | 1.00                           |         |
| Prior claims                              |                       | 0.306   |                                | 0.661   |
| Yes                                       | 1.07 (0.91, 1.26)     |         | 1.03 (0.87, 1.22)              |         |
| No                                        | 1.00                  |         | 1.00                           |         |
| Union membership                          |                       | <0.001  |                                | 0.014   |
| Yes                                       | 1.29 (1.11, 1.50)     |         | 1.14 (0.96, 1.36)              |         |
| No                                        | 1.00                  |         | 1.00                           |         |
| Missing                                   | 1.34 (1.07, 1.68)     |         | 1.27 (1.01, 1.60)              |         |
| Employer RTW program                      |                       | <0.001  |                                | <0.001  |
| Yes                                       | 1.73 (1.43, 2.09)     |         | 1.77 (1.45, 2.18)              |         |

|                                                                            |                           |       |                           |       |
|----------------------------------------------------------------------------|---------------------------|-------|---------------------------|-------|
| No<br>Missing                                                              | 1.00<br>1.17 (0.87, 1.58) |       | 1.00<br>1.18 (0.86, 1.60) |       |
| Doubt Work-relatedness                                                     |                           | 0.174 |                           | 0.119 |
| Yes                                                                        | 0.94 (0.76, 1.16)         |       | 0.87 (0.70, 1.08)         |       |
| No                                                                         | 1.00                      |       | 1.00                      |       |
| Missing                                                                    | 1.13 (0.92, 1.39)         |       | 1.08 (0.87, 1.33)         |       |
| <b>Time-dependent predictors*</b>                                          |                           |       |                           |       |
| Chiropractic care received<br>after the accident prior to<br>claim closure | 1.11 (0.95, 1.30)         | 0.096 | 1.08 (0.91, 1.29)         | 0.268 |
| Physiotherapy after the<br>accident prior to claim closure                 | 0.96 (0.83, 1.10)         | 0.420 | 0.99 (0.85, 1.16)         | 0.913 |

HR>1 indicates faster claim closure; RTW = return to work

\* The time-dependent predictors are “turned on” once the claimant has received their first service after their accident.

**Table S4: Search strategy for observational studies exploring the association of early opioid, physiotherapy, or chiropractic care with Workers' Compensation claim duration, for cases of acute low back pain**

MEDLINE (OvidSP)

- 1 exp Whiplash Injuries/
- 2 exp Soft Tissue Injuries/
- 3 repetitive strain injur\$.mp.
- 4 carpal tunnel syndrome.mp.
- 5 exp Cumulative Trauma Disorders/
- 6 exp Back pain/ or exp pain/ or chronic pain.tw.
- 7 exp Anxiety/
- 8 exp Depression/
- 9 exp Neck Pain/
- 10 exp Depressive Disorder/
- 11 exp Back Injuries/
- 12 injured worker\$.mp.
- 13 musculoskeletal injur\$.mp.
- 14 or/1-13
- 15 exp "Wounds and Injuries"/
- 16 Musculoskeletal System/ or Musculoskeletal Diseases/
- 17 15 and 16
- 18 14 or 17
- 19 exp insurance claim reporting/ or exp "insurance claim review"/ or exp insurance, disability/ or insurance, liability/
- 20 Insurance, Accident/
- 21 ((worker\$ or workman\$ or workmen&) adj compensation).mp. or exp Workers' compensation/
- 22 claim.mp.
- 23 claimant.mp.
- 24 or/19-23
- 25 prognosis.mp. or exp Prognosis/
- 26 Time/ or exp Time Factors/
- 27 exp "Recovery of Function"/
- 28 "Severity of Illness Index"/
- 29 exp Trauma Severity Indices/
- 30 (recovery or prognostic).mp.
- 31 or/25-30
- 32 18 and 24 and 31
- 33 exp Disability Evaluation/
- 34 24 and 31 and 33
- 35 exp Occupational Diseases/ or exp Accidents, Occupational/ or (occupational injur: or occupational accident:).mp.
- 36 24 and 31 and 35
- 37 exp Accidents, Traffic/
- 38 24 and 31 and 37
- 39 "Compensation and Redress"/
- 40 18 and 31 and 39

41 exp Work Capacity Evaluation/ or exp workload/ or workload.mp.  
42 (18 or 35) and 24 and 41  
43 32 or 34 or 36 or 38 or 40 or 42  
44 18 or 33  
45 31 or 41  
46 35 and 44 and 45  
47 46 or 43

#### EMBASE (OvidSP)

1 whiplash injur\$.mp. or exp whiplash injury/  
2 exp soft tissue injury/  
3 soft tissue injur\$.mp.  
4 repetitive strain injur\$.mp.  
5 carpal tunnel syndrome.mp. or exp carpal tunnel syndrome/  
6 exp cumulative trauma disorder/  
7 back pain.mp. or exp backache/  
8 backpain.mp.  
9 chronic pain.mp. or exp chronic pain/  
10 exp pain/  
11 anxiety/  
12 exp depression/  
13 neck pain.mp. or exp neck pain/  
14 back injur\$.mp.  
15 low back injury/  
16 injured worker\$.mp.  
17 musculoskeletal injury/  
18 occupational injuries.mp. or exp occupational accident/  
19 occupational accidents.mp.  
20 occupational diseases.mp. or exp occupational disease/  
21 or/1-20  
22 insurance/ or exp compensation/ or exp workman compensation/ or exp health insurance/ or  
exp "health plan employer data and information set"/  
23 accident insurance.mp.  
24 exp workman compensation/  
25 ((worker\$ or workman\$ or workmen&) adj compensation).mp.  
26 (claim or claimant).mp.  
27 or/22-26  
28 prognosis.mp. or prognosis/  
29 exp time/  
30 recovery of function.mp. or convalescence/  
31 disease severity/  
32 exp injury scale/  
33 (recovery or prognostic).mp.  
34 workload.mp. or exp workload/  
35 exp work capacity/  
36 exp work resumption/ or return to work.mp.  
37 or/28-36

38 21 and 27 and 37  
39 or/1-17  
40 or/18-20  
41 37 and 39 and 40  
42 38 or 41

PsycInfo (OvidSP)

1 exp Whiplash/  
2 whiplash injur:.mp.  
3 soft tissue injur\$.mp.  
4 cumulative trauma disorder\$.mp.  
5 repetitive strain injur\$.mp.  
6 carpal tunnel syndrome.mp.  
7 back pain.mp. or exp Back Pain/  
8 (backpain or backache).mp.  
9 chronic pain.mp. or exp Chronic Pain/  
10 exp Musculoskeletal Disorders/ or exp Fibromyalgia/ or fibromyalgia.mp.  
11 exp Anxiety/  
12 exp "Depression (Emotion)"/ or exp Major Depression/  
13 neck pain.mp.  
14 back injur:.mp.  
15 musculoskeletal injur\$.mp.  
16 exp Industrial Accidents/  
17 exp Occupational Safety/  
18 (occupational injur: or occupational accident:).mp.  
19 exp Work Related Illnesses/  
20 or/1-19  
21 exp Workers' Compensation Insurance/  
22 exp Employee Health Insurance/  
23 exp Insurance/  
24 disability insurance.mp.  
25 (claim or claimant).mp.  
26 ((worker: or workman: or workmen:) adj compensation).mp.  
27 accident insurance.mp.  
28 or/21-27  
29 prognosis.mp. or exp Prognosis/  
30 exp Time/  
31 time factors.mp.  
32 exp "Recovery (Disorders)"/  
33 recovery of function.mp.  
34 exp "Severity (Disorders)"/ or severity of illness.mp.  
35 (recovery or prognostic).mp.  
36 exp Work Load/ or workload.mp. or exp Job Performance/  
37 exp Vocational Evaluation/ or exp Disability Evaluation/ or work capacity evaluation.mp. or  
exp Reemployment/  
38 work resumption.mp.  
39 or/29-38  
40 20 and 28 and 39

41 16 or 17 or 18 or 19  
42 or/1-15  
43 39 and 41 and 42  
44 28 and 41  
45 40 or 43 or 44

CINAHL (Ebsco)

49 S46 or S48  
S48 S22 and S45 and S47  
S47 S23 or S24 or S25 or S26  
S46 S27 and S33 and S45  
S45 S34 or S35 or S36 or S37 or S38 or S39 or S40 or S41 or S42 or S43 or S44  
S44 (MH "Disability Evaluation+")  
S43 "work resumption"  
S42 "return to work" OR (MH "Job Re-Entry")  
S41 (MH "Work Capacity Evaluation")  
S40 (MH "Workload Measurement") OR (MH "Workload") OR "workload"  
S39 (recovery or prognostic)  
S38 (MH "Severity of Illness") OR (MH "Severity of Illness Indices+")  
S37 (MH "Recovery")  
S36 "recovery of function"  
S35 (MH "Time+") OR (MH "Time Factors")  
S34 (MH "Prognosis+") OR "prognosis"  
S33 S28 or S29 or S30 or S31 or S32  
S32 "accident insurance"  
S31 (worker\* N2 compensation) OR (workman\* N2 compensation) OR (workmen\* N2 compensation)  
S30 (Claim or claimant)  
S29 (MH "Insurance") OR (MH "Insurance, Disability+")  
S28 (MH "Worker's Compensation")  
S27 S22 or S23 or S24 or S25 or S26  
S26 "occupational accident" OR (MH "Accidents, Occupational+")  
S25 "occupational injur\*"  
S24 (MH "Occupational-Related Injuries")  
S23 (MH "Occupational Diseases+")  
S22 S18 or S21  
S21 S19 and S20  
S20 (MH "Wounds and Injuries+") OR (MH "Occupational-Related Injuries")  
S19 (MH "Musculoskeletal Diseases+") or (MH "Musculoskeletal System+")  
S18 S1 or S2 or S3 or S4 or S5 or S6 or S7 or S8 or S9 or S10 or S11 or S12 or S13 or S14 or S15 or S16 or S17  
S17 "musculoskeletal injur\*"  
S16 "back injur\*"  
S15 (MH "Back Injuries+")  
S14 (MH "Neck Pain") OR "neck pain"  
S13 (MH "Depression+")  
S12 (MH "Anxiety+")  
S11 (MH "Pain+")

S10 (MH "Fibromyalgia") OR "fibromyalgia"  
S9 (MH "Chronic Pain") OR "chronic pain"  
S8 (backpain or backache)  
S7 (MH "Back Pain") OR "back pain"  
S6 (MH "Carpal Tunnel Syndrome") OR "carpal tunnel syndrome"  
S5 "repetitive strain injur\*"  
S4 (MH "Cumulative Trauma Disorders+")  
S3 "soft tissue injur\*"  
S2 (MH "Soft Tissue Injuries")  
S1 "whiplash injur\*" OR (MH "Whiplash Injuries")

**Figure S1: Flow diagram of the literature search process for randomized controlled trials assessing the effect of opioids, physiotherapy, or chiropractic care for acute low back pain.**

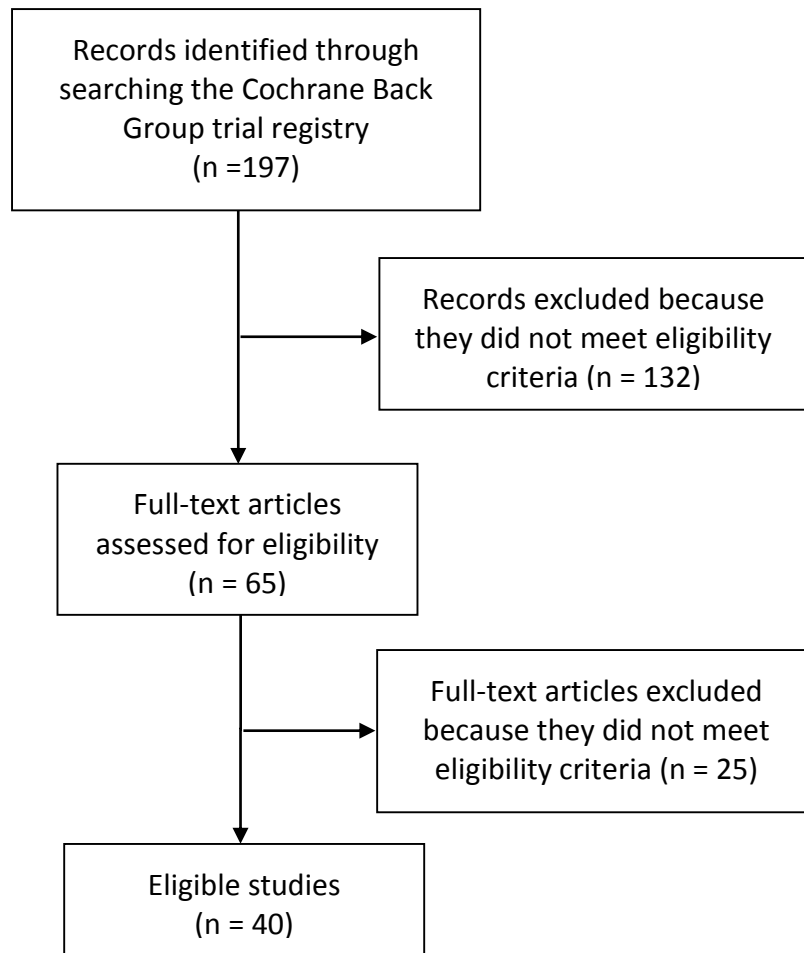

**Figure S2: Flow diagram of the literature search process for observational studies assessing the effect of early opioids, physiotherapy, or chiropractic care for acute low back pain.**

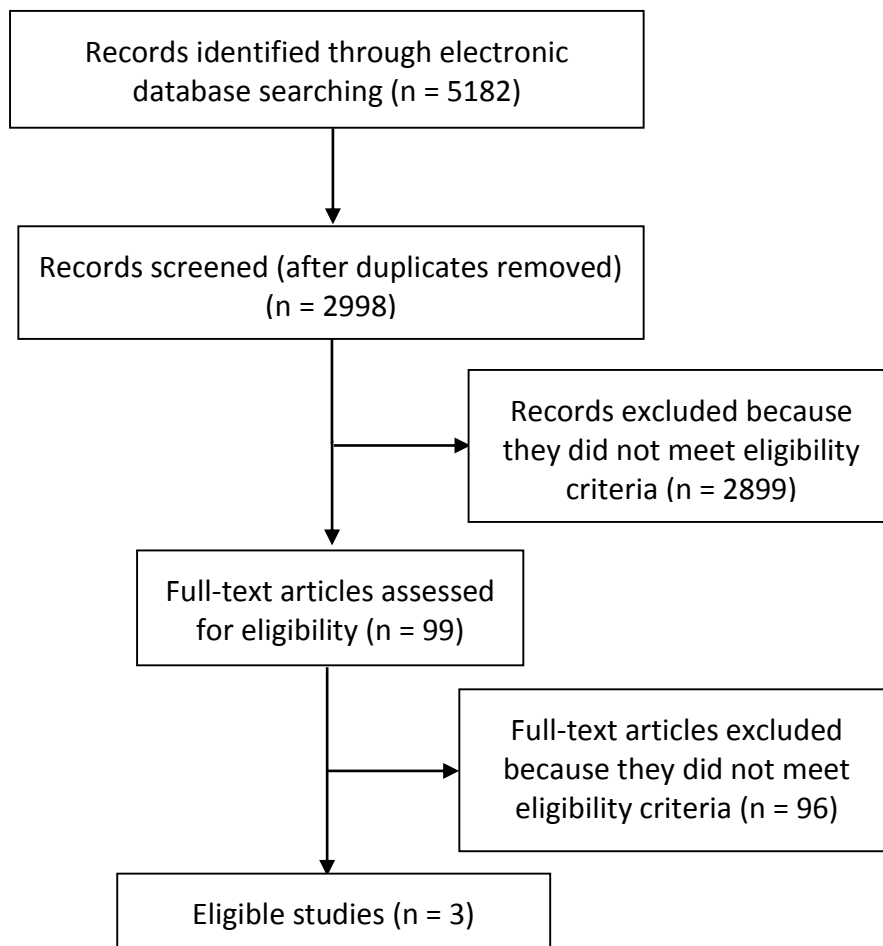

Supplement: bmjopen-2015-007836supp.pdf [file bmjopen-2015-007836supp.pdf]
